# Supplementary material for: Trial Assay for Safe First-Aid Protocol for the Stinging Sea Anemone <em>Anemonia viridis</em> (Cnidaria: Anthozoa) and a Severe Toxic Reaction
Source: Preprints.org preprint supplement (doi:10.20944/preprints202112.0108.v1), 2021-12-07
Supplement: Supplementary file 2 [file supplementary]



# Guía de identificación de **MEDUSAS Y OTROS ORGANISMOS GELATINOSOS**

## **LA MAR DE MEDUSAS**

Con la colaboración de

 **Institut  
de Ciències  
del Mar**

 **CSIC**  
CONSEJO SUPERIOR DE INVESTIGACIONES CIENTÍFICAS

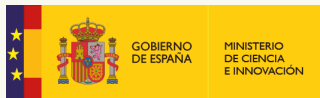

**FECYT**  **FUNDACIÓN ESPAÑOLA  
PARA LA CIENCIA  
Y LA TECNOLOGÍA**

¿Has visto una medusa?

¿Quieres participar en un proyecto de Ciencia Ciudadana?

Puedes enviar tus avistamientos a

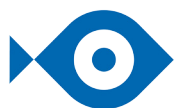

**Observadores  
del Mar**

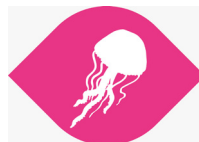

**Proyecto  
Alerta Medusas**

¿Cómo funciona?

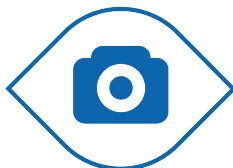

*Haz una foto*

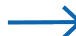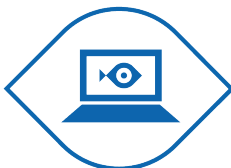

*Súbela a la web*

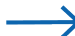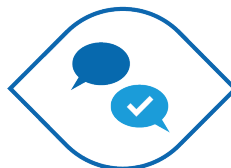

*Dialoga y obtén  
validación con  
los equipos  
científicos*

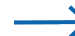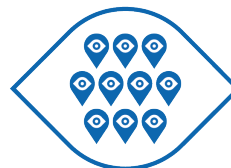

*Amplía el  
conocimiento*

[www.observadoresdelmar.es](http://www.observadoresdelmar.es)

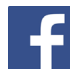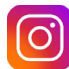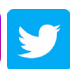

@obsdelmar

# Clasificación taxonómica

Las medusas son invertebrados marinos del zooplancton gelatinoso que pertenecen a tres filos diferentes: Chordata, Ctenophora y Cnidaria.

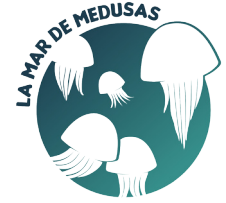

## ORGANISMOS GELATINOSOS

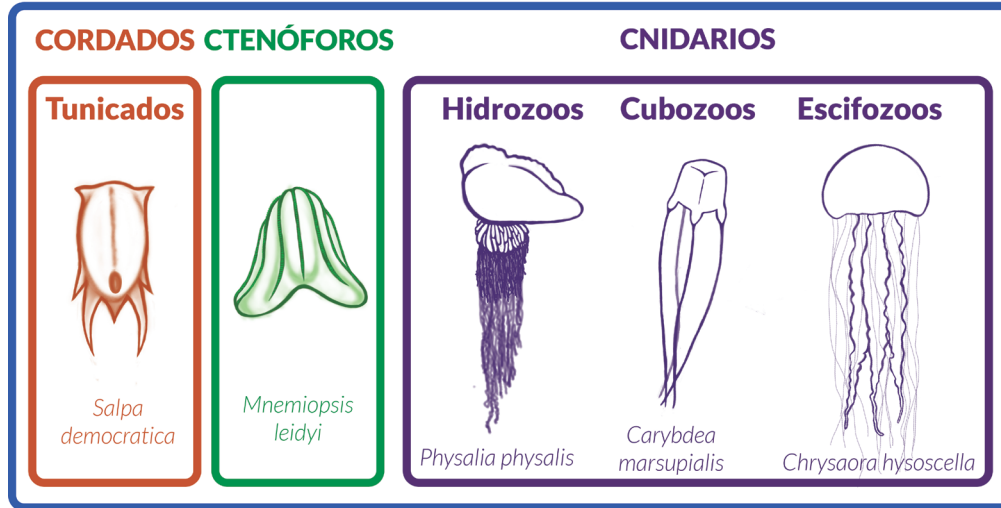

Lau López

El filum Chordata está representado por el subfilum Tunicata que incluye a las salpas, organismos gelatinosos sin células urticantes. El filum Ctenophora que incluye a los ctenóforos que presentan diversas formas y se caracterizan por la presencia de 8 bandas longitudinales de cilios. El filum Cnidaria, que incluye a los corales, las anémonas, las gorgonias y al grupo más numeroso de medusas clasificadas en cuatro Clases: Staurozoa, Hydrozoa, Cubozoa y Scyphozoa, que son conocidas como las “verdaderas medusas”.

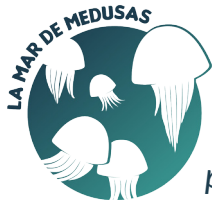

# Ciclo de vida de las medusas

Las medusas presentan diferentes ciclos de vida dependiendo de la especie. El que se presenta en esta guía es el más común para las medusas de la costa española, donde se alternan diferentes formas de vida y modelos reproductivos.

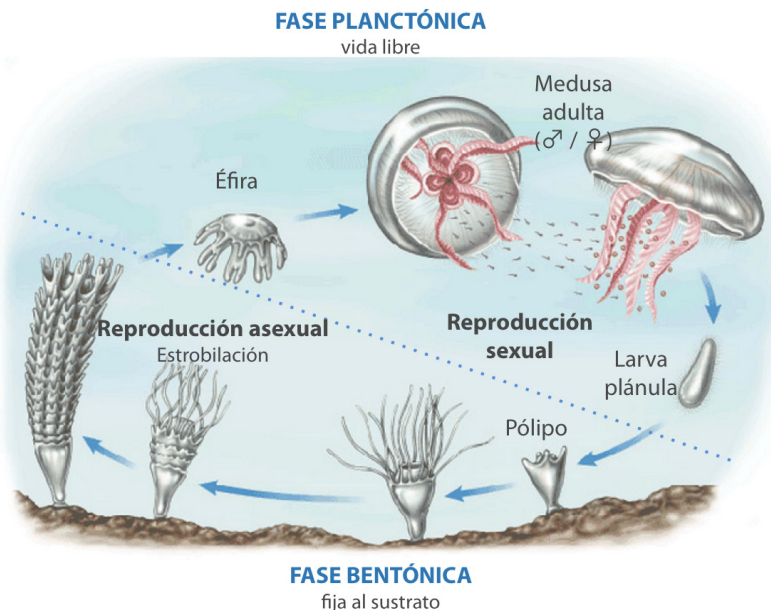

Los huevos fertilizados de medusas adultas se transforman en larvas llamadas plánulas, que nadan hasta adherirse a un sustrato, dando lugar a un pólipo e iniciando la fase bentónica.

El pólipo crece, se desarrolla y cuando las condiciones ambientales son óptimas, el pólipo se reproduce de forma asexual mediante el proceso de estrobilación, segmentando su cuerpo y dando lugar a múltiples pequeñas éfiras. Las éfiras, que nadan libres por la columna de agua, dan el inicio a la fase pelágica.

Las éfiras crecen y se desarrollan formando las medusas adultas que se reproducen sexualmente con fecundación interna o externa, produciendo huevos fértiles que iniciarán el ciclo nuevamente.



# Anatomía de las medusas

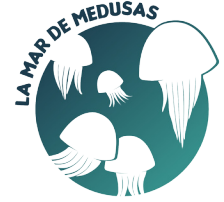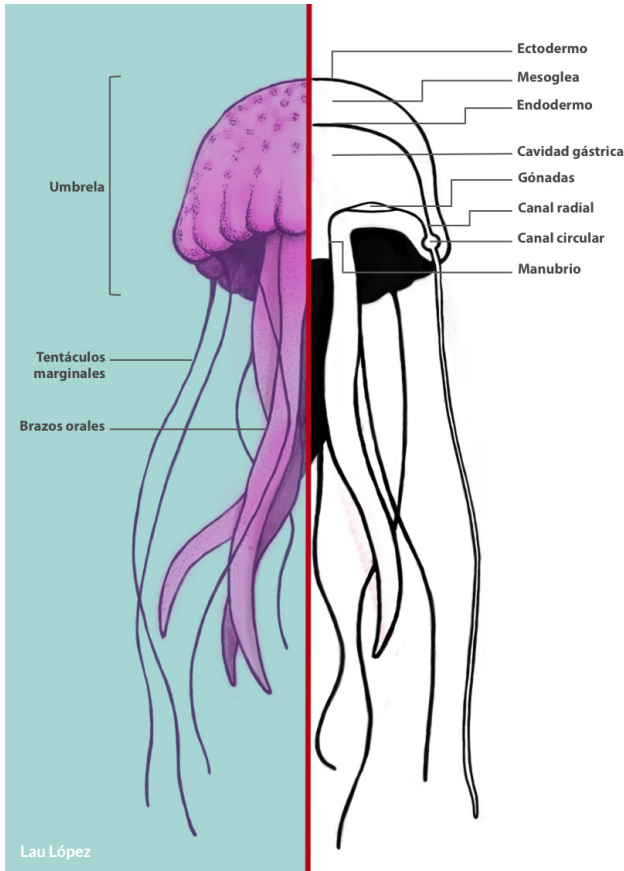

*Las medusas están compuestas principalmente de agua (95%). Las medusas están formadas de una variedad de tejidos, con una capa exterior o ectoderma y una interior o endoderma, separadas por una capa gelatinosa llamada mesoglea.*

*Su organización o morfología general es bastante simple. Presentan un saco en el extremo, en forma de campana llamado umbrela. En el interior se encuentran las estructuras encargadas de la digestión (cavidad gástrica) y la reproducción (gónadas). En el centro de la cara cóncava de la umbrela hay un orificio que hace la función de boca y de orificio excretor. Alrededor de este orificio se encuentran los brazos orales, que son tentáculos gruesos agrupados que forman una especie de tubo llamado manubrio. En algunas especies, desde el borde de la umbrela nacen los tentáculos marginales. El número y longitud varía según la especie.*

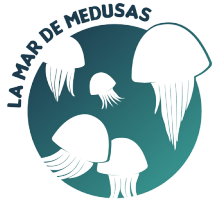

## ¿Por qué pican las medusas?

Las medusas tienen células urticantes especializadas llamadas cnidocitos. Se utilizan principalmente para alimentarse y defenderse. Están distribuidas por todo el cuerpo del animal pero más concentradas a lo largo de los tentáculos.

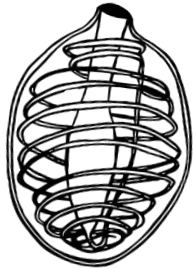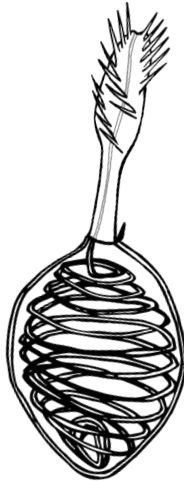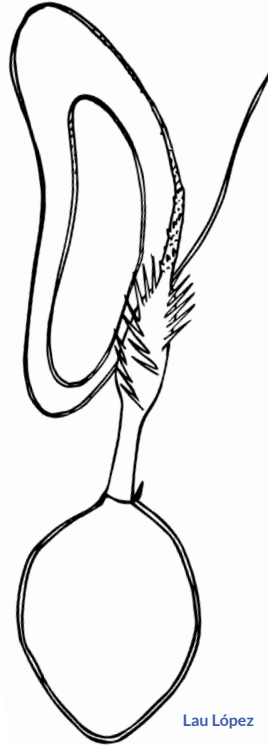

Cada cnidocito contiene una cápsula con un filamento enrollado, casi siempre con espinas, y con toxinas. Cuando se activa, la cápsula se abre y el filamento se dispara penetrando al animal y vaciando el veneno contenido en la cápsula. El mecanismo se lleva a cabo en menos de una millonésima de segundo, lo que genera un impacto en el punto de penetración de más de 70 toneladas por centímetro cuadrado. Está considerado uno de los procesos de exocitosis más rápidos del reino animal.

Lau López

# Capacidad urticante y peligrosidad

La capacidad tóxica de una medusa persiste después de su muerte durante bastante tiempo. El grado de toxicidad del veneno varía dependiendo de la especie. La capacidad urticante de cada especie se clasifica en esta guía en 4 categorías:

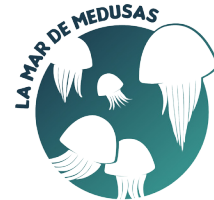

## CAPACIDAD TÓXICA

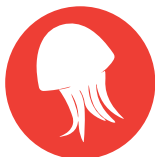

### MUY URTICANTE

Especie con alta capacidad urticante con efectos importantes sobre la salud humana. Se recomienda evitar todo contacto con esta medusa.

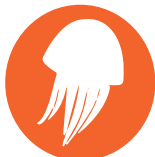

### URTICANTE

Especie con mediana capacidad urticante que podría producir efectos importantes sobre la salud humana. Se recomienda evitar todo contacto con esta medusa.

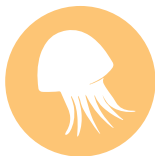

### POCO URTICANTE

Especie con baja capacidad urticante con muy poco o casi ningún efecto sobre la salud humana. Aún así, se recomienda no tocarla ya que podría haber algún tipo de reacción dérmica post-contacto.

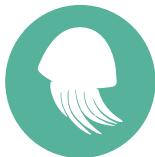

### NO URTICANTE

Especie sin células urticantes. Completamente inofensiva para la salud humana.

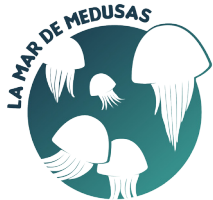

# Recomendaciones generales para el tratamiento de picaduras producidas por medusas

**NO aplicar amoníaco**

**NO aplicar alcohol**

**NO frotar**

**NO aplicar vendajes a presión**

**NO aplicar vinagre**

*(excepto en casos específicos)*

# Protocolo de actuación inmediata en caso de picadura de medusas

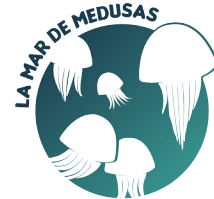

¿Reconoces la especie que te ha picado?

NO

**Aplica el protocolo general.**

Se utiliza en caso de picadura de *Pelagia noctiluca*,  
*Rhizostoma pulmo*,  
*Chrysaora hysoscella*,  
de otras especies urticantes  
y en caso de especie no identificada

SÍ

Utiliza la guía para saber qué protocolo aplicar.

**\*En caso de duda, aplicar el protocolo general.**

## PROTOCOLO GENERAL

1

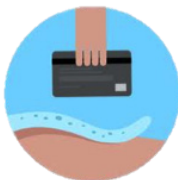

Eliminar los restos de tentáculos y/o fragmentos de medusas

2

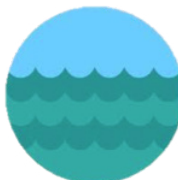

Lavar con agua de mar

3

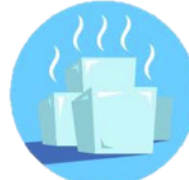

Aplicar frío por 15' (en lapsos de 3' +2' de descanso)

4

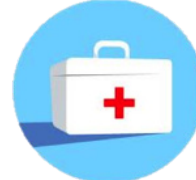

Si el dolor persiste, consultar al médico o profesional de salud

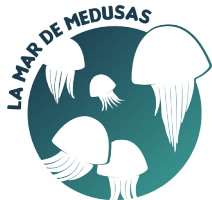

# Características de la picadura de las diferentes especies de medusas a modo general

## ***Pelagia noctiluca***

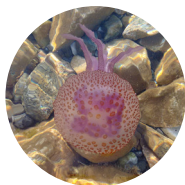

Su picadura produce una sensación de picor, dolor intenso, inflamación y enrojecimiento de la piel. La picadura produce urticaria y edema, además de vesículas, pápulas o costras que pueden aparecer y permanecer. Otros síntomas, aunque son poco comunes, pueden ser náuseas, vómitos, calambres musculares y dificultad respiratoria.

## ***Rhizostoma pulmo***

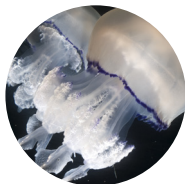

Su picadura puede ser dolorosa aunque en general produce un ligero escozor y una irritación intensa. El contacto con esta medusa o con fragmentos de ella puede producir cuadros dermatológicos en algunas personas, pero generalmente no son graves. Esta especie libera un moco que contiene células urticantes y aún cuando no haya un contacto directo, sí que podría haber una reacción dermatológica al estar en contacto con el agua.

## ***Physalia physalis***

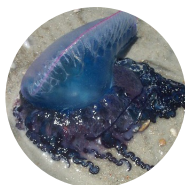

El veneno de las células urticantes de esta especie tiene propiedades neurotóxicas, citotóxicas y cardiotóxicas. El contacto puede producir escozor y dolor intenso y en algunos casos reacciones sistémicas. En la zona de contacto suele aparecer una línea de pápulas blancas y un margen rojo. Entre los efectos sistémicos que podrían observarse se incluyen temblores, diarrea, vómitos y convulsiones.

# Características de la picadura de las diferentes especies de medusas a modo general



## *Chrysaora hysoscella*

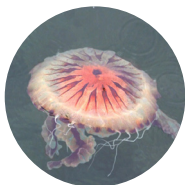

Su picadura generalmente produce un dolor fuerte que escuece y picor los primeros 20 minutos después del contacto y que generalmente desaparece las primeras dos horas. También podrían aparecer eritematoso y edemas durante las 48 horas siguientes al contacto. En muy pocos casos se han reportado síntomas más severos.

## *Carybdea marsupialis*

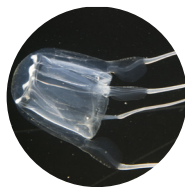

La picadura de esta especie es muy dolorosa, pero los efectos tienen corta duración. Generalmente aparecen unas pápulas rojizas en la piel y en algunos casos excepcionales se pueden observar calambres musculares, vómitos, cansancio y ansiedad.

## *Olindias muelleri*

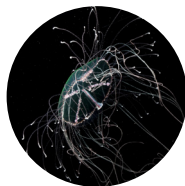

Después de la picadura de esta especie aparecen unas líneas rojizas en zig-zag en la piel que son muy características. El dolor es intenso e instantáneo.

# Índice de las especies de la guía

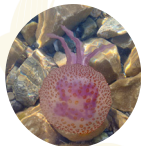

***Pelagia noctiluca***  
página 13

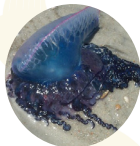

***Physalia physalis***  
página 19

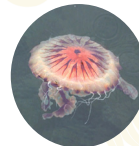

***Chrysaora hysoscella***  
página 25

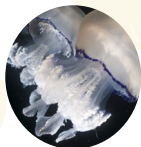

***Rhizostoma pulmo***  
página 15

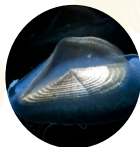

***Velella velella***  
página 21

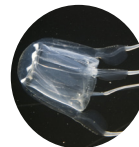

***Carybdea marsupialis***  
página 27

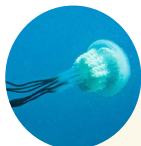

***Rhizostoma luteum***  
página 17

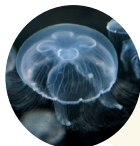

***Aurelia spp.***  
página 23

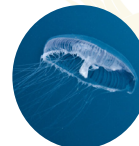

***Aequorea forskalea***  
página 29

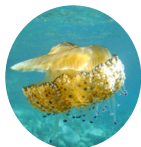

***Cotylorhiza tuberculata***  
página 18

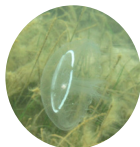

***Discomedusa lobata***  
página 24

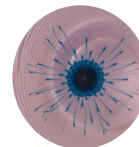

***Porpita porpita***  
página 30



# Índice de las especies de la guía

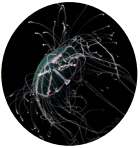

***Olindias muelleri***  
página 31

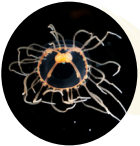

***Gonionemus vertens***  
página 32

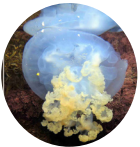

***Catostylus tagi***  
página 33

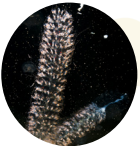

**Sifonóforos**  
página 34

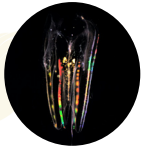

**Salpas**  
página 35

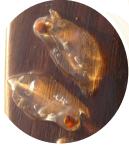

***Leucothea multicornis***  
página 36

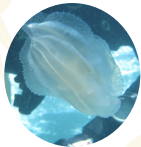

***Beroe ovata***  
página 37

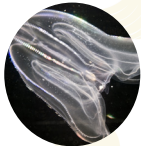

***Mnemiopsis leidyi***  
página 38

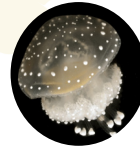

***Phyllorhiza punctata***  
página 39

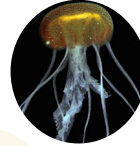

**Otras medusas del Mediterráneo**  
página 40

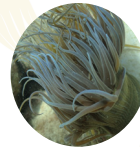

**Otros Cnidarios del Mediterráneo**  
página 44

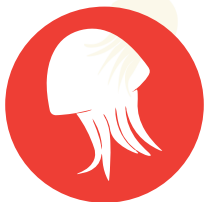

## MUY URTICANTE

Umbrella hasta 25 cm  
4 brazos orales  
8 tentáculos  
marginales

**CNIDARIO**  
Escifozoo

EN CASO DE  
PICADURA  
SEGUIR LAS  
RECOMENDACIONES  
DEL PROTOCOLO  
GENERAL

# Pelagia noctiluca

## Medusa luminiscente o clavel

### Descripción

Color rosa rojizo. Los juveniles pueden ser de color marrón claro a oscuro. El diámetro de la umbrella puede alcanzar hasta 25 cm. La umbrella es semiesférica con 4 brazos orales y 8 tentáculos marginales (que extendidos alcanzan hasta 2 m de longitud). La superficie de la umbrella está cubierta de verrugas marrones. Es una especie oceánica y su presencia en la costa depende de las condiciones ambientales y climatológicas. Es una especie bioluminiscente.

1

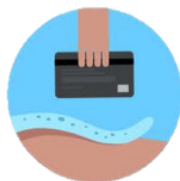

Eliminar los restos  
de tentáculos y/o  
fragmentos de medusas

2

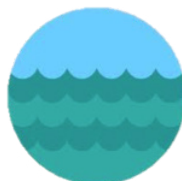

Lavar con  
agua de mar

3

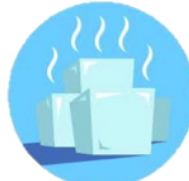

Aplicar frío por 15'  
(en lapsos de 3'  
+2' de descanso)

4

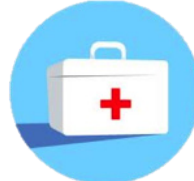

Si el dolor persiste,  
consultar al médico o  
profesional de salud

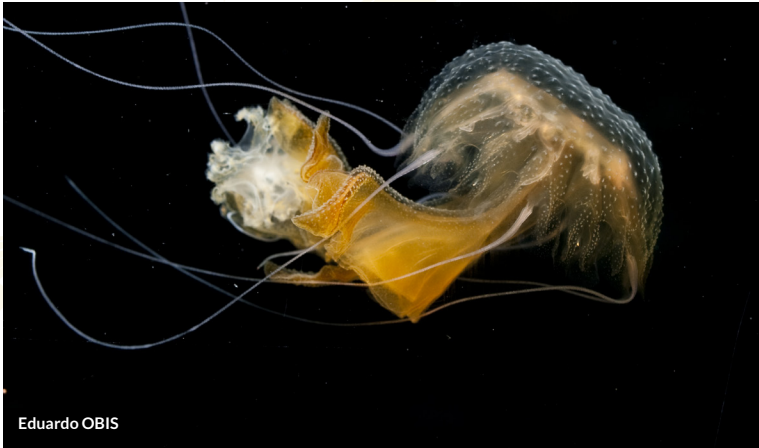

Eduardo OBIS

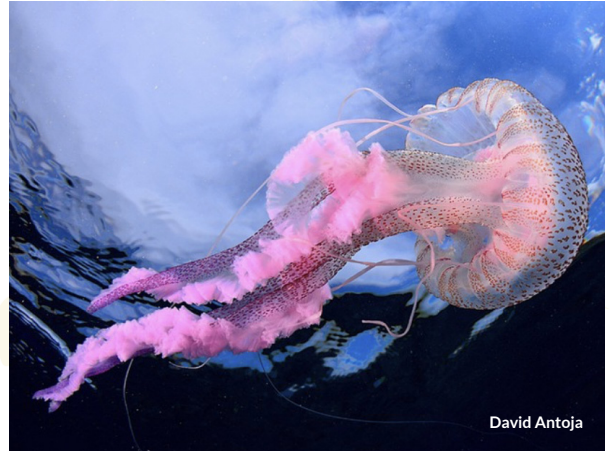

David Antoja

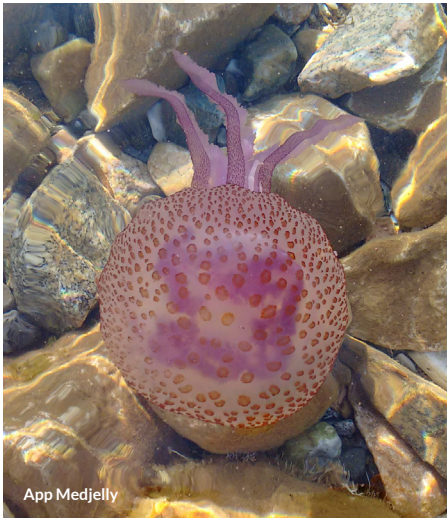

App Medjelly

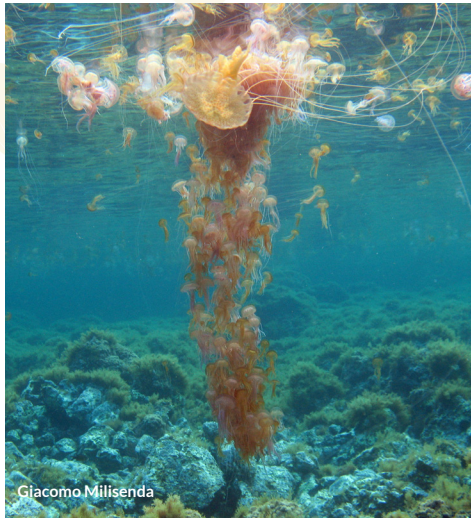

Giacomo Millisenda

Su ciclo de vida es completamente pelágico. Los huevos fertilizados se transforman en plánulas que darán lugar directamente a las pequeñas éfiras sin la presencia de pólipos ni fase bentónica.

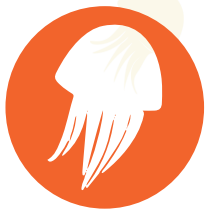**URTICANTE**

Umbrella hasta 40 cm  
8 brazos orales  
Sin tentáculos marginales

**CNIDARIO**  
**Escifozoo**

EN CASO DE  
PICADURA  
SEGUIR LAS  
RECOMENDACIONES  
DEL PROTOCOLO  
GENERAL  
**página 8**

# Rhizostoma pulmo

Acalefo azul

**Descripción**

*El diámetro de la umbrela puede alcanzar hasta 40 cm. La umbrela es acampanada de color blanco azulado y con un ribete violeta. No tiene tentáculos marginales pero si 8 brazos orales gruesos de color blanco azulado, fusionamos y sin ramificaciones. Es una de las medusas más grandes de la costa mediterránea española.*

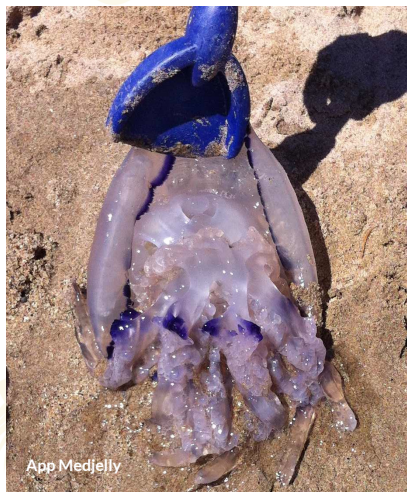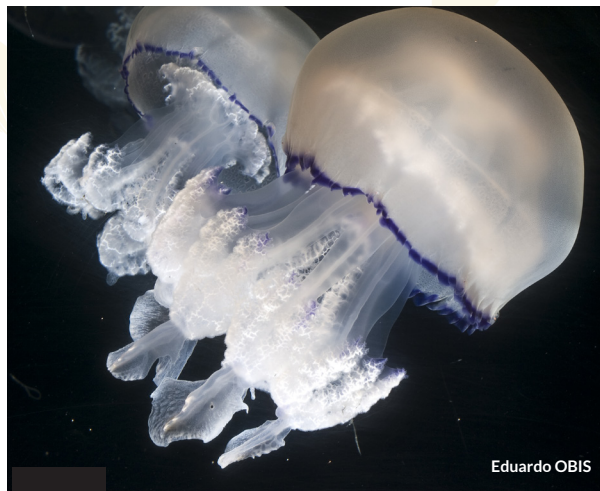



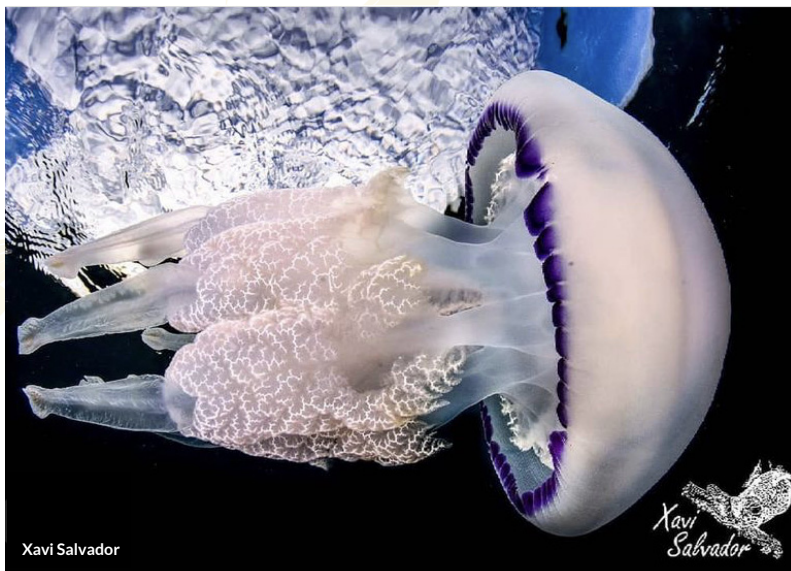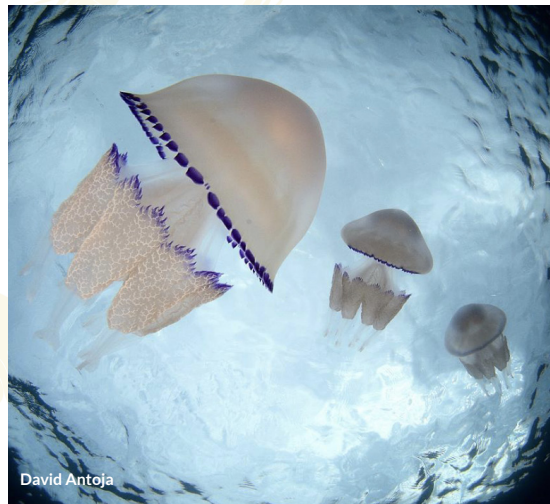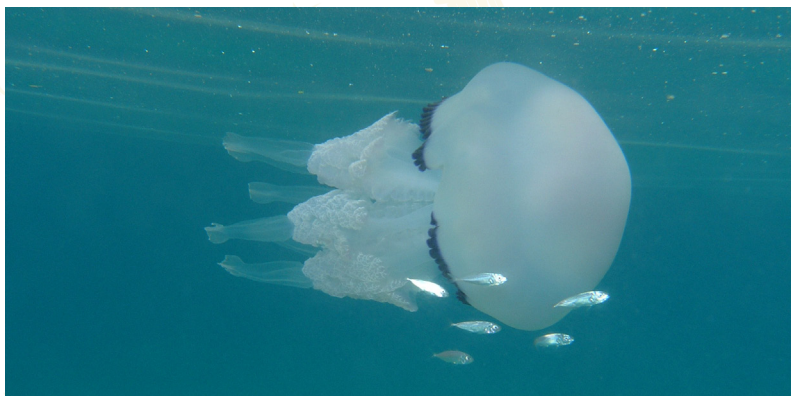

Las medusas pequeñas son visibles durante la primavera y los adultos de mayor tamaño son más evidentes durante el verano y al comienzo del otoño en la costa mediterránea española. Es una especie costera, que se distribuye a lo largo de la columna de agua. Suelen estar acompañadas por cangrejos y peces juveniles que la utilizan como refugio.

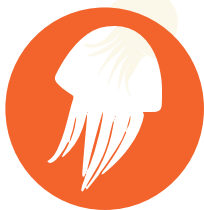

## URTICANTE

Umbrella hasta 70cm  
8 brazos orales  
Sin tentáculos  
marginales

**CNIDARIO**  
Escifozoo

EN CASO DE  
PICADURA  
SEGUIR LAS  
RECOMENDACIONES  
DEL PROTOCOLO  
GENERAL  
página 8

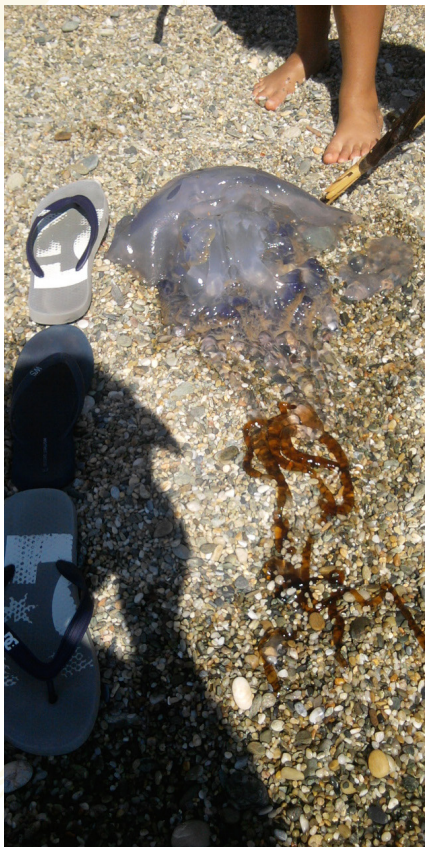

# Rhizostoma luteum

## Descripción

Umbrella acampanada de color blanco azulado que mide hasta 70 cm de diámetro, con ausencia del ribete violeta característico de la especie *R. pulmo*. Sin tentáculos marginales y con 8 brazos orales de coloración gris-negra en la parte distal, que pueden medir hasta 2 m de longitud.

Se puede observar sola o formando enjambres. Fue descrita por primera vez en 1827 en el Mediterráneo, y a partir del 2012 se comenzó a observar de forma más frecuente.

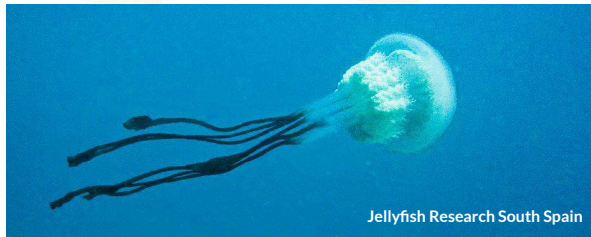

Jellyfish Research South Spain

# Cotylorhiza tuberculata

## Medusa huevo frito

El diámetro de la umbrela puede alcanzar los 35 cm. La umbrela tiene forma aplanada, es marrón-amarillenta y tiene una gran protuberancia central de color naranja más oscuro. No tiene tentáculos marginales pero sí consta de 8 brazos orales con 3 apéndices en el extremo en forma de botón y de color blanco o azul. Es una especie costera, endémica del Mediterráneo y con preferencia de aguas más cálidas. Los adultos son más abundantes a finales del verano y a principios del otoño en la costa mediterránea española. Suelen estar acompañadas de peces juveniles que la utilizan como refugio.

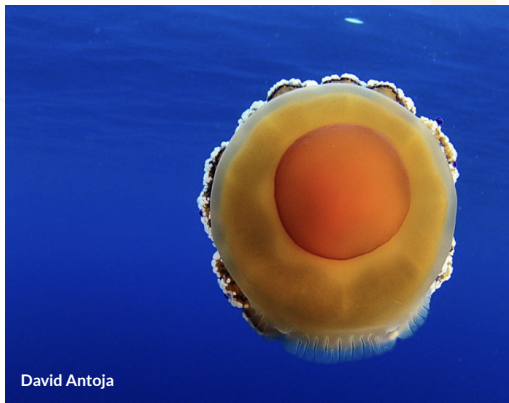

David Antoja

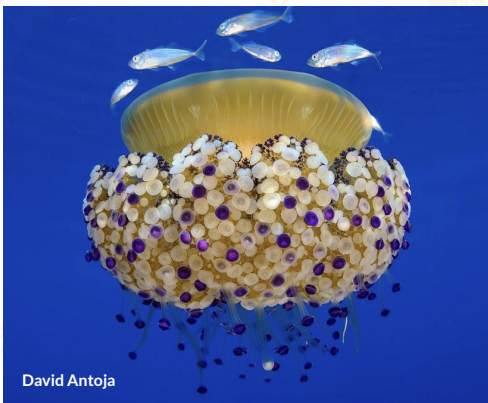

David Antoja

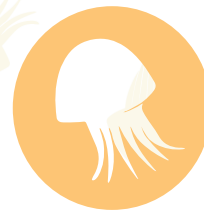

**POCO URTICANTE**

**Umbrela hasta 35 cm**  
**8 brazos orales**  
**Sin tentáculos marginales**

**CNIDARIO**  
**Escifozoo**

**EN CASO DE**  
**PICADURA**  
**SEGUIR LAS**  
**RECOMENDACIONES**  
**DEL PROTOCOLO**  
**GENERAL**  
**página 8**



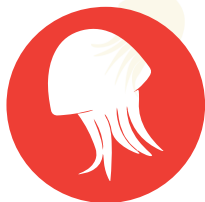

## MUY URTICANTE

Parte flotante  
hasta 30 cm de largo  
y 10 cm de ancho  
Tentáculos 20 m

**CNIDARIO**  
Hidrozoo  
Sifonóforo

EN CASO DE  
PICADURA  
SEGUIR LAS  
RECOMENDACIONES  
DEL PROTOCOLO  
ESPECÍFICO 1

## Descripción

Es un organismo colonial del orden de los sifonóforos. Está compuesto por una cámara llena de gas, violeta y translúcida coronada por una vela. La parte flotante puede alcanzar hasta 30 cm de largo y 10 cm de ancho. La parte sumergida está formada por tentáculos azules finos y largos que extendido pueden llegar a medir 20 m. Es nativa del océano Atlántico pero ocasionalmente (en primavera) puede observarse en algunas zonas del Mediterráneo.

# Physalia physalis

Carabela portuguesa

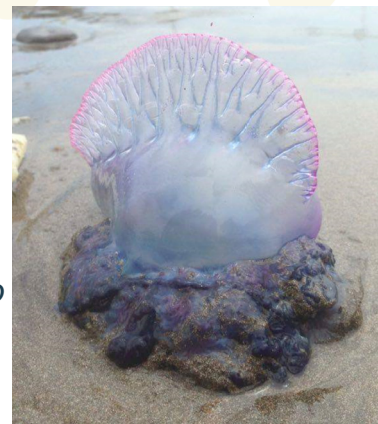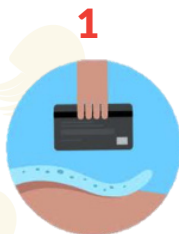

Eliminar los restos  
de tentáculos y/o  
fragmentos de medusas

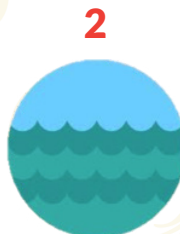

Lavar con  
agua de mar

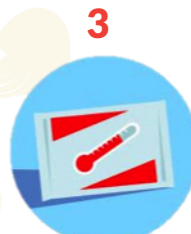

Aplicar Hot packs o  
inmersión en agua caliente  
(40° o 45°) durante 15'

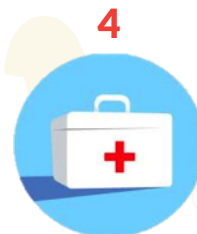

Si el dolor persiste,  
consultar al médico o  
profesional de salud



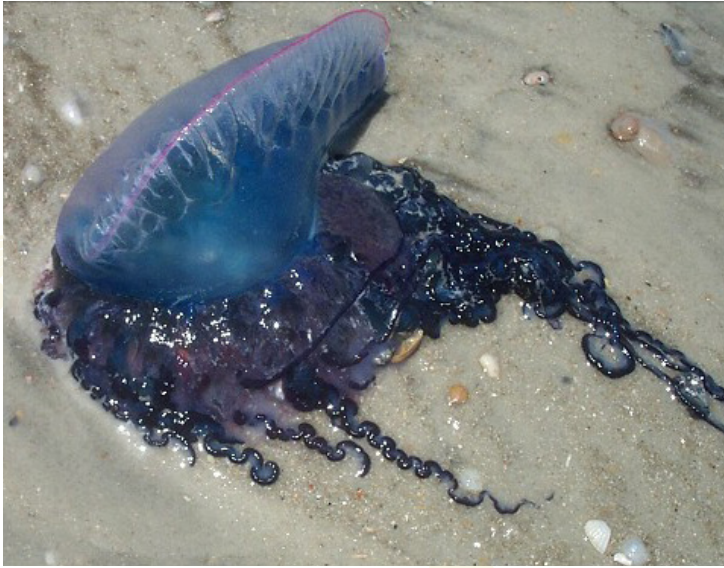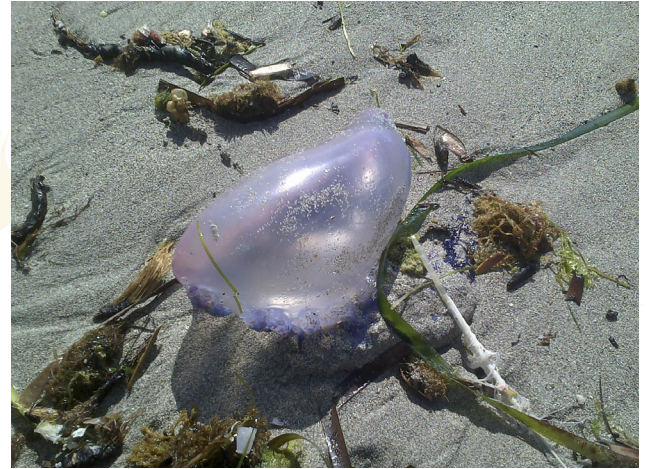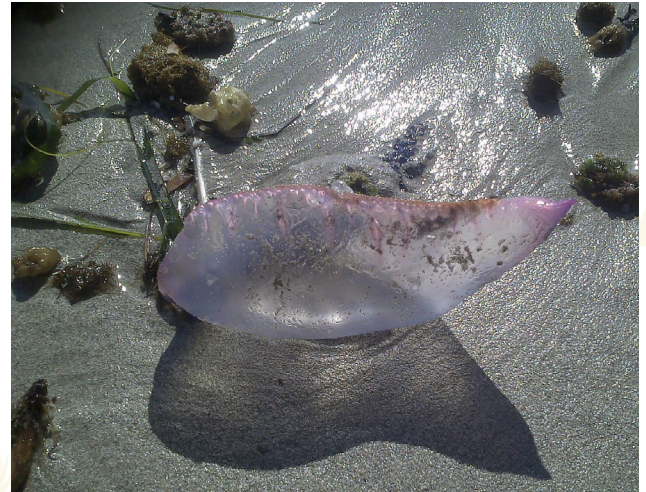

Cada conjunto de organismos que forman la colonia está especializado en diversas tareas que aseguran la supervivencia de la especie.

El neumatóforo proporciona la flotabilidad . Los dactilozoides se encargan de la defensa y de atrapar el alimento que es digerido por los gastrozoides. Los gonozoides están especializados en la reproducción.

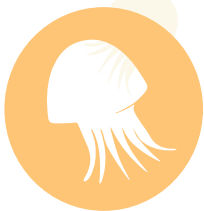

**POCO URTICANTE**

**Disco ovalado**  
de hasta 8 cm  
**Vela triangular**  
**Colonia de pólipos**  
especializados

**CNIDARIO**  
**Hidrozoo**

**EN CASO DE**  
**PICADURA**  
**SEGUIR LAS**  
**RECOMENDACIONES**  
**DEL PROTOCOLO**  
**GENERAL**  
**página 8**

# Velella velella

Barquitas De San Pedro o vela púrpura

## Descripción

*Es una hidromedusa y la fase de su ciclo de vida que normalmente observamos es una colonia de pólipos flotantes. Está compuesta por un disco ovalado azul que puede alcanzar hasta 8 cm de diámetro y una vela triangular perpendicular al disco. Bajo el velo del disco se encuentran los pólipos especializados, encargados de producir pequeñas medusas que se reproducen sexualmente para formar nuevas colonias flotantes.*

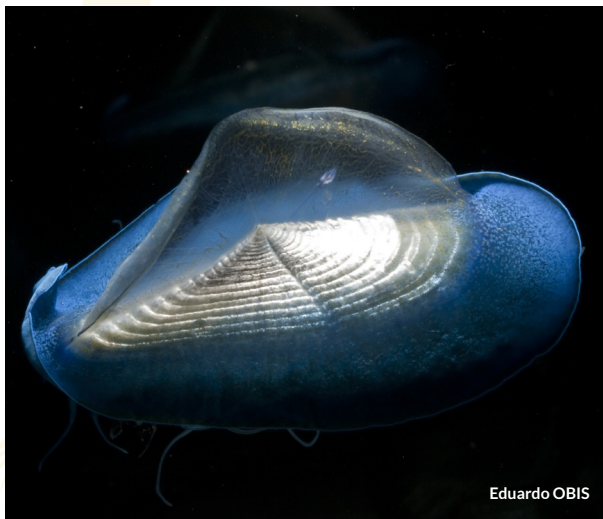

Eduardo OBIS

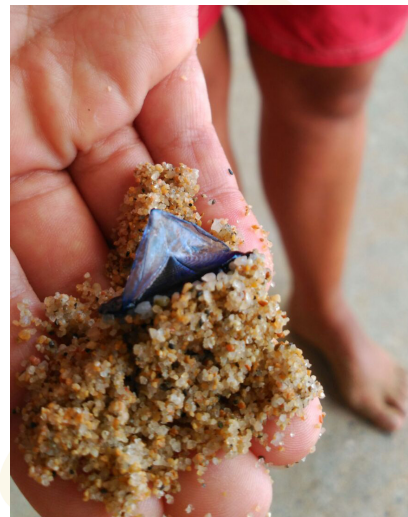



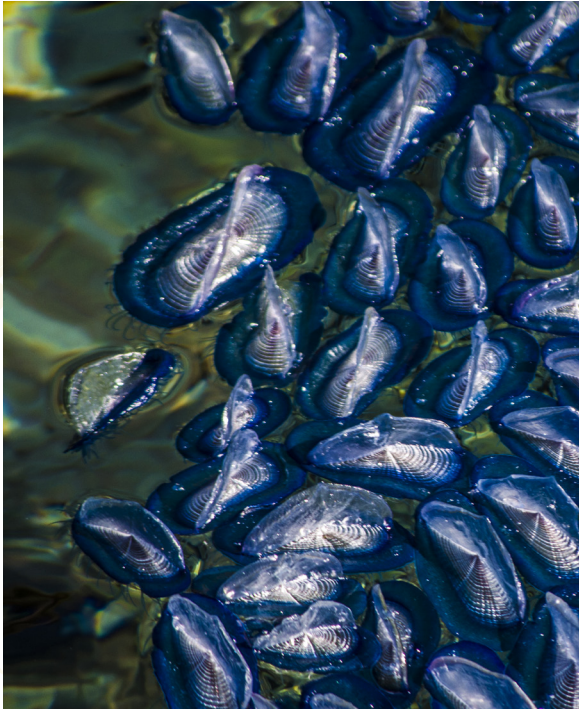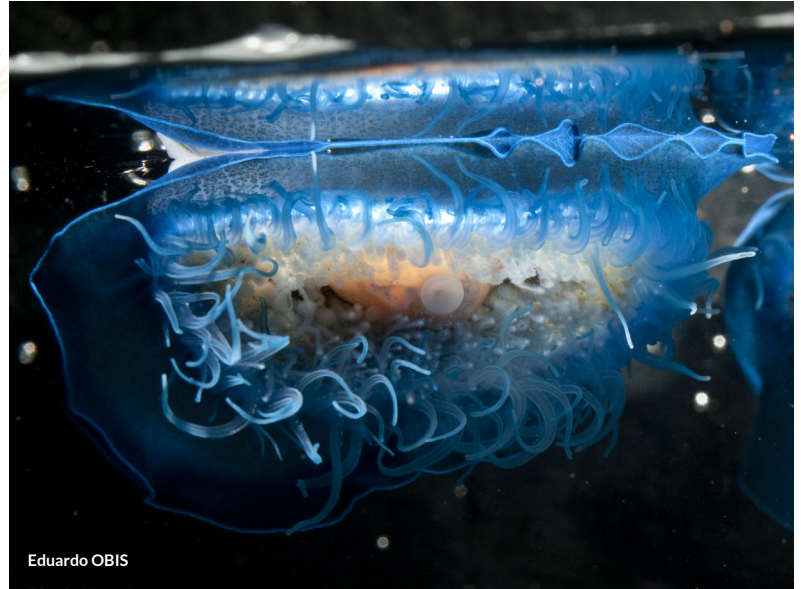

Eduardo OBIS

Es una especie frecuente en el Mediterráneo y en el Atlántico, especialmente hacia finales del invierno y durante la primavera, llegando a formar grandes enjambres que alcanzan la costa.

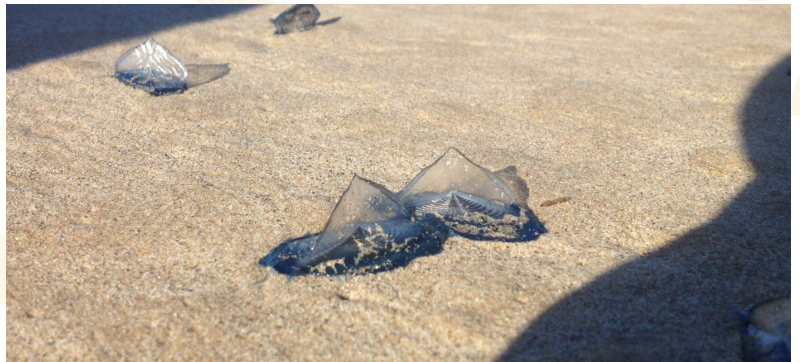

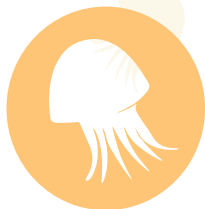

## POCO URTICANTE

Umbrella hasta 25 cm  
Centenares  
de tentáculos  
marginales  
4 brazos orales  
Gónadas en forma de  
herradura

## CNIDARIO Escifozoo

EN CASO DE  
PICADURA  
SEGUIR LAS  
RECOMENDACIONES  
DEL PROTOCOLO  
GENERAL  
página 8

## Descripción

*El diámetro de la umbrella puede medir hasta 25 cm. La umbrella es translúcida con forma aplanada. Tiene 4 brazos orales largos y centenares de tentáculos marginales cortos y finos. En la umbrella se observan 4 órganos reproductores (gónadas) en forma de herradura y de color blanquecino amarillento o ligeramente rosa. Es una especie cosmopolita. Es una especie costera que se puede encontrar incluso en estuarios y puertos.*

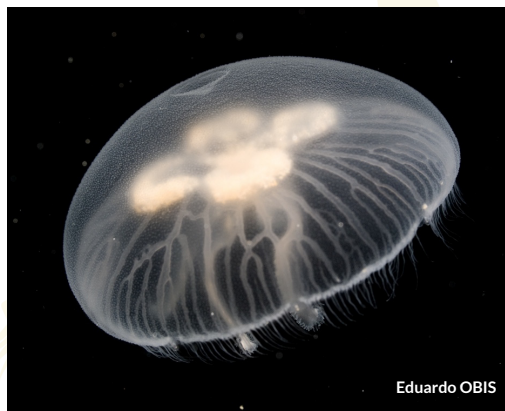

Eduardo OBIS

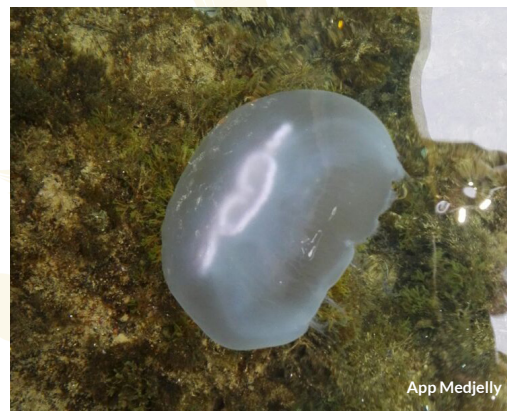

App Medjelly

# Aurelia spp.

Medusa luna o común

# Discomedusa lobata

## Descripción

El diámetro de la umbrela puede medir hasta unos 10-15 cm. La umbrela es aplanada y translúcida con 4 gónadas visibles de color blanquecino.

Tiene 4 brazos orales y 48 tentáculos marginales muy finos. En el MEditerráneo era considerada una especie rara, pero desde el año 2013 es bastante abundante en ciertas zonas de la costa de Cataluña. Esta especie se suele confundir con Aurelia spp. La característica que permite diferenciarlas fácilmente es la forma de las gónadas. En *D. lobata*, ocupan todo el perímetro de la umbrela formando un único cordón, mientras que en *Aurelia* spp. presentan forma de herradura en el centro de la umbrela.

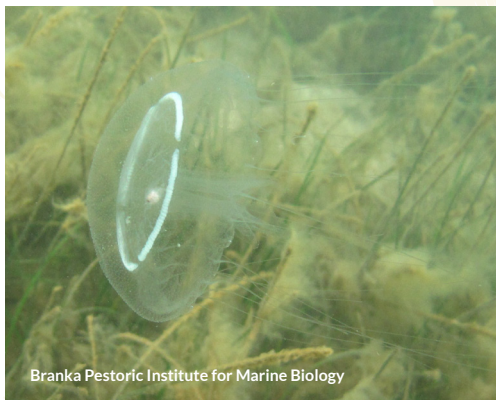

Branka Pestoric Institute for Marine Biology

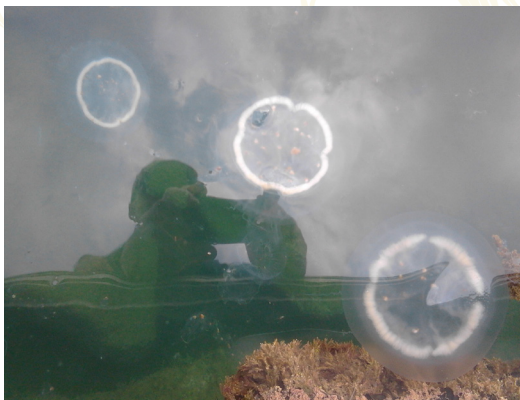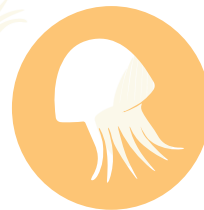

**POCO URTICANTE**

**Umbrela hasta  
15 cm**

**48 tentáculos  
marginales**

**4 brazos orales**

**Gónadas en forma  
de cordón**

**CNIDARIO**  
**Escifozoo**

**EN CASO DE  
PICADURA  
SEGUIR LAS  
RECOMENDACIONES  
DEL PROTOCOLO  
GENERAL  
página 8**



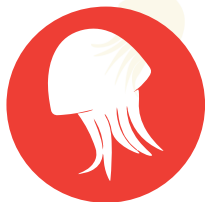

## MUY URTICANTE

Umbrella hasta 30 cm  
16 bandas marrones  
4 brazos orales  
24 tentáculos marginales

## CNIDARIO Escifozoo

EN CASO DE  
PICADURA  
SEGUIR LAS  
RECOMENDACIONES  
DEL PROTOCOLO  
GENERAL

## Descripción

*El diámetro de la umbrela puede medir hasta 30 cm. La umbrela es semiesférica y aplanada de color blanco amarillento, con 16 bandas marrones en forma de V en la superficie. Tiene 4 brazos orales largos de hasta 1 m de longitud y 24 tentáculos marginales largos y finos.*

# Chrysaora hysoscella

## Acalefo radiante o medusa compás

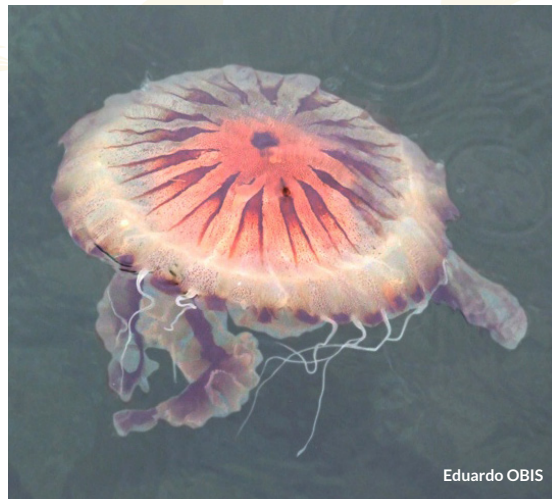

Eduardo OBIS

1



Eliminar los restos de tentáculos y/o fragmentos de medusas

2

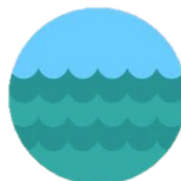

Lavar con agua de mar

3

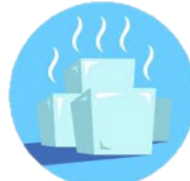

Aplicar frío por 15' (en lapsos de 3' +2' de descanso)

4

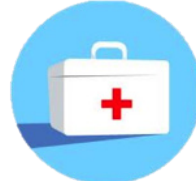

Si el dolor persiste, consultar al médico o profesional de salud

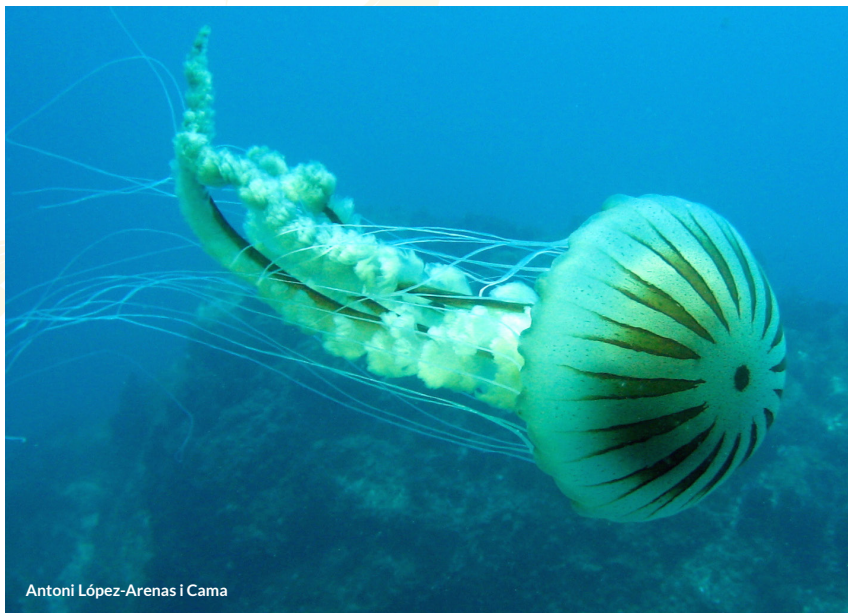

Antoni López-Arenas i Cama

Puede ser bastante abundante en algunas áreas del Mediterráneo español aunque raramente forma enjambres. Normalmente está presente durante la primavera. Suelen estar acompañadas de peces juveniles.

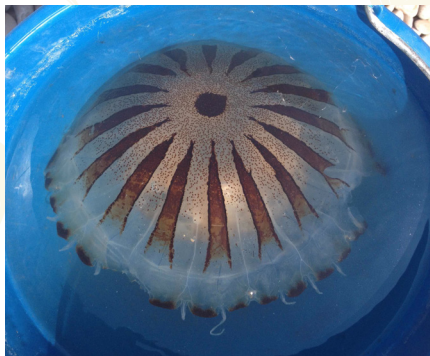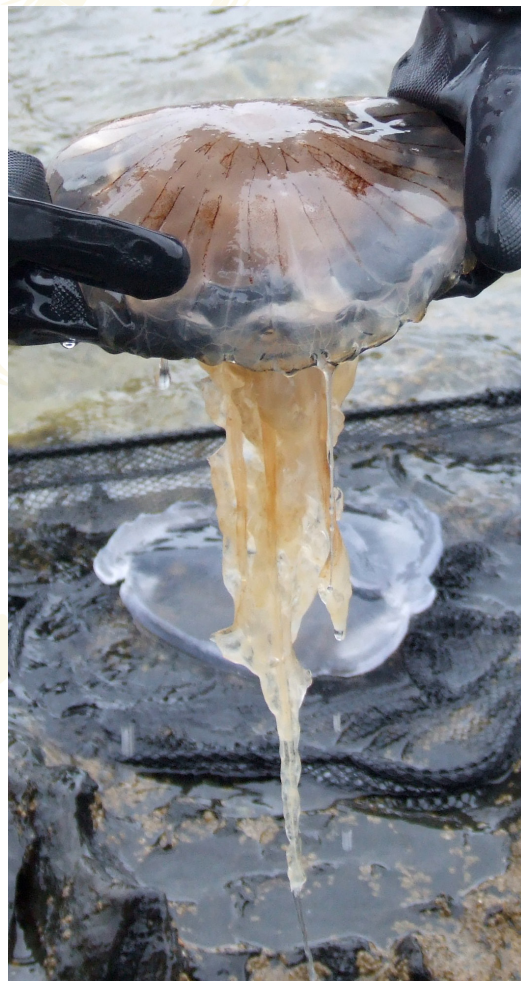

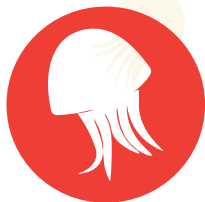

## MUY URTICANTE

Umbrella hasta 5 cm  
Forma de cubo  
4 tentáculos  
Sin brazos orales

**CNIDARIO**  
Cubozoo

EN CASO DE  
PICADURA  
SEGUIR LAS  
RECOMENDACIONES  
DEL PROTOCOLO  
ESPECÍFICO 2

# Carybdea marsupialis

Cubomedusa o avispa de mar

## Descripción

El diámetro de la umbrella puede alcanzar hasta 5 cm. La umbrella tiene forma de cubo, es translúcida y de una coloración blanca azulada. Tiene 4 tentáculos largos que nacen de cada extremo de la umbrella. *C. marsupialis* es la única especie de cubomedusa conocida del Mediterráneo, pero su veneno no es letal.

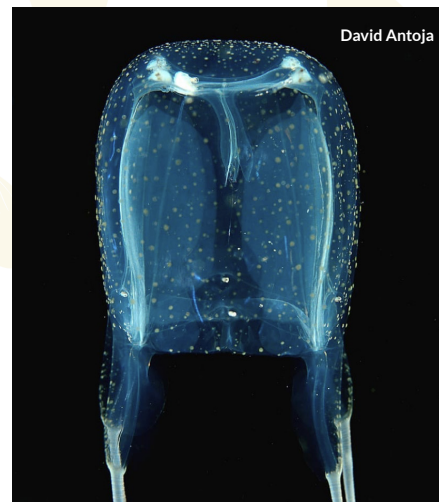

1

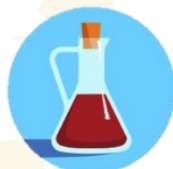

Lavar con  
vinagre  
comercial

2

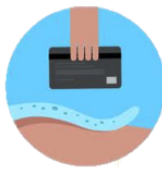

Eliminar los restos  
de tentáculos y/o  
fragmentos de  
medusas

3

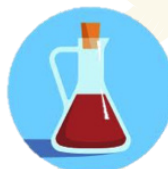

Lavar  
nuevamente  
con vinagre  
comercial

4

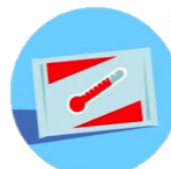

Aplicar Hot packs o  
inmersión en agua  
caliente (40° o 45°)  
durante 15'

5

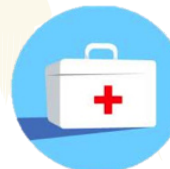

Si el dolor persiste,  
consultar al médico  
o profesional de  
salud



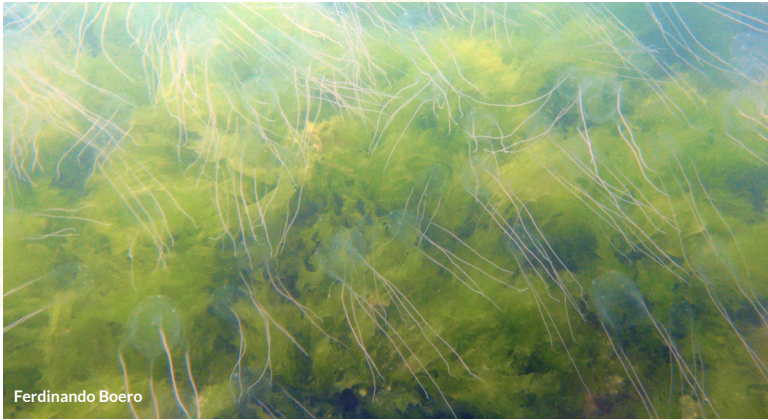

Ferdinando Boero

*Se suele encontrar en aguas poco profundas. El ambiente preferido de esta especie es el sustrato arenoso, y se localiza en el fondo durante el día, desplazándose hacia la superficie durante la noche.*

*Es muy abundante en ciertas áreas de la costa mediterránea española.*

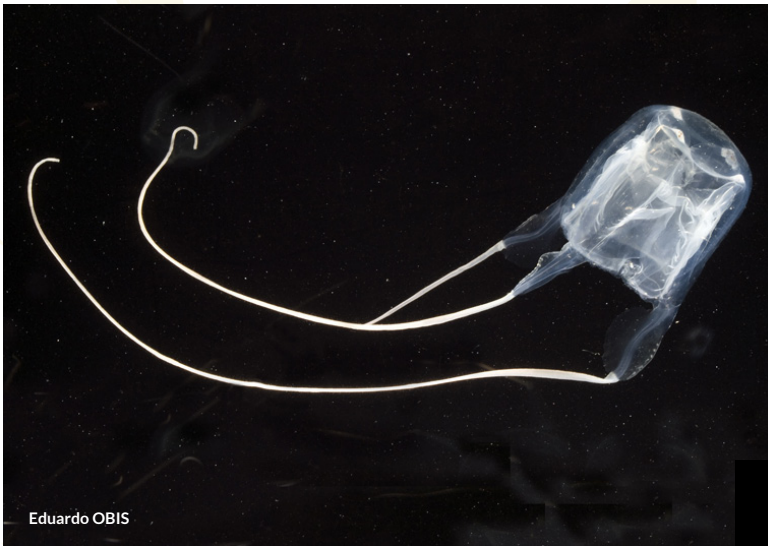

Eduardo OBIS

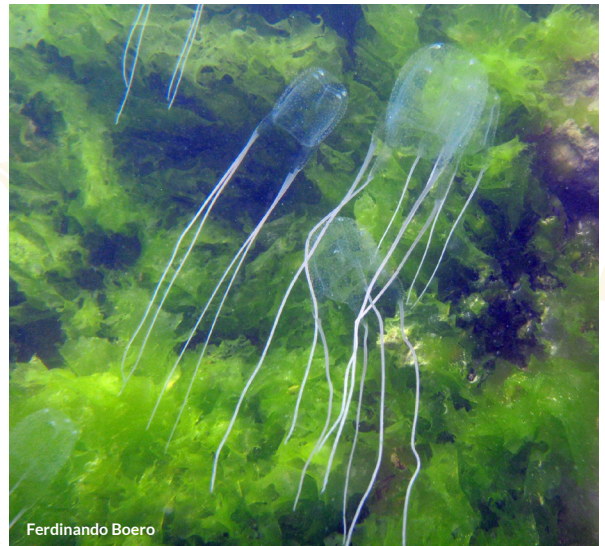

Ferdinando Boero

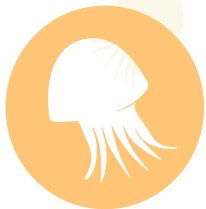**POCO URTICANTE**

Umbrella hasta 40 cm

Numerosos  
tentáculos

Sin brazos orales

Canales radiales de  
color azul

**CNIDARIO**

Hidrozoos

**EN CASO DE  
PICADURA  
SEGUIR LAS  
RECOMENDACIONES  
DEL PROTOCOLO  
GENERAL  
página 8**

# Aequorea forskalea

Medusa aequorea

## Descripción

Es una hidromedusa con la umbrela aplanada y más densa en el centro. El diámetro de la umbrela puede alcanzar hasta 40 cm. La umbrela es translúcida con canales radiales de color azul. Tiene numerosos tentáculos finos y no presenta brazos orales. Esta especie habita desde aguas templadas a tropicales, en áreas costeras y litorales, apareciendo incluso de forma ocasional en mar abierto. Es una especie frecuente en el Mediterráneo español, siendo más común durante la primavera y formando grandes enjambres ocasionales.

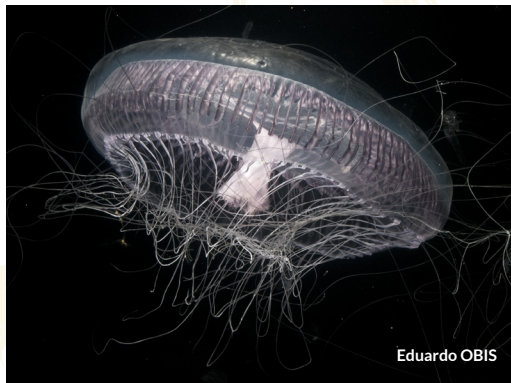

Eduardo OBIS

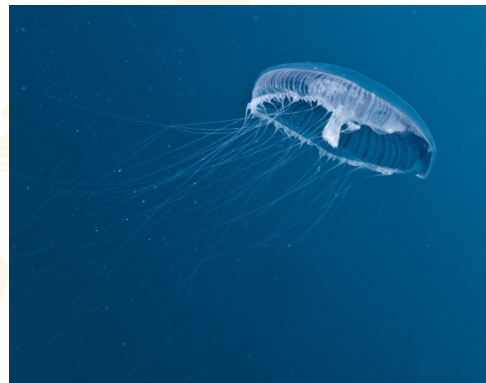

# Porpita porpita

## Botón azul

### Descripción

Es una hidromedusa de la cual normalmente observamos la fase de su ciclo de vida que corresponde a una colonia flotante de pólipos. El diámetro del disco puede alcanzar 5 cm y es de color azul intenso. Se compone de dos partes: un flotador duro, marrón dorado y lleno de gas en el centro, y de una colonia de hidroides de color azul intenso, morados o amarillos, que parecen tentáculos. Es un organismo colonial que vive en la superficie de mar abierto, pero puede encontrarse en zonas costera en grandes cantidades. Es ocasional en el mar Mediterráneo.

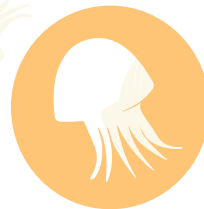

**POCO URTICANTE**

Disco hasta 5 cm  
Flotador duro  
Colonia de hidroides  
Color azul intenso

**CNIDARIO**  
Hidrozoos

**EN CASO DE  
PICADURA  
SEGUIR LAS  
RECOMENDACIONES  
DEL PROTOCOLO  
GENERAL  
página 8**

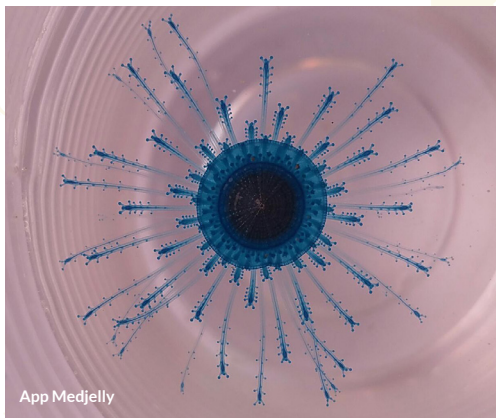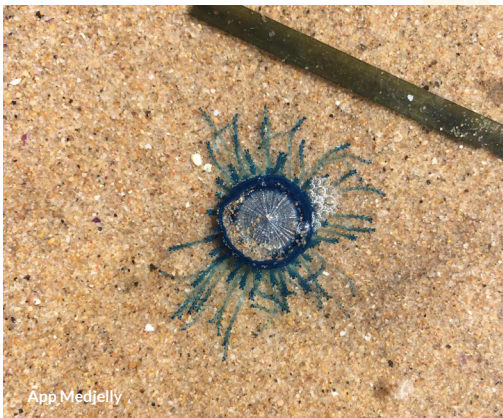



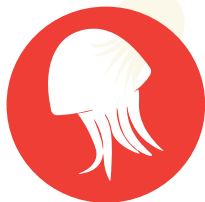

## MUY URTICANTE

Umbrella hasta 8 cm  
Muchos tentáculos cortos  
Sin brazos orales  
Gónadas en cruz

**CNIDARIO**  
Hidrozo

**EN CASO DE  
PICADURA  
SEGUIR LAS  
RECOMENDACIONES  
DEL PROTOCOLO  
GENERAL**

## Descripción

*Hidromedusa de umbrella abombada, translúcida, de hasta 8 cm de diámetro, rodeada de muchos tentáculos cortos de color morado. Presenta 4 gónadas en forma de cruz de color granate. Tiene pigmentación fluorescente visible durante la noche. Localizada en zonas específicas de la costa catalana.*

# Olindias muelleri

(*Olindias phosphorica* anteriormente)

Medusa cruz

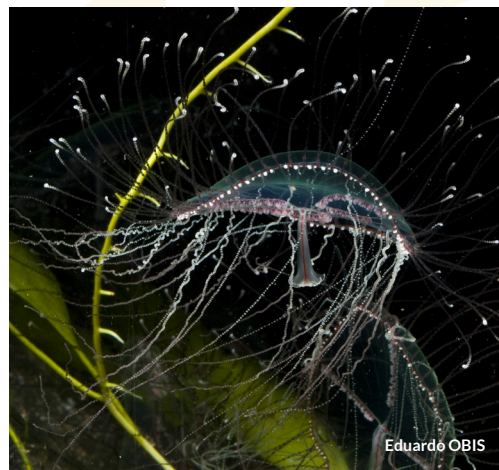

Eduardó OBIS

1

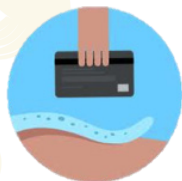

Eliminar los restos de tentáculos y/o fragmentos de medusas

2

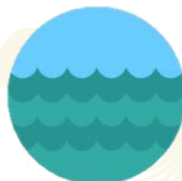

Lavar con agua de mar

3

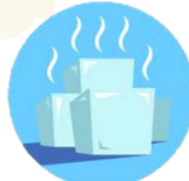

Aplicar frío por 15' (en lapsos de 3' +2' de descanso)

4

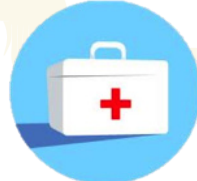

Si el dolor persiste, consultar al médico o profesional de salud

# Gonionemus vertens

## Medusa de rayas naranjas

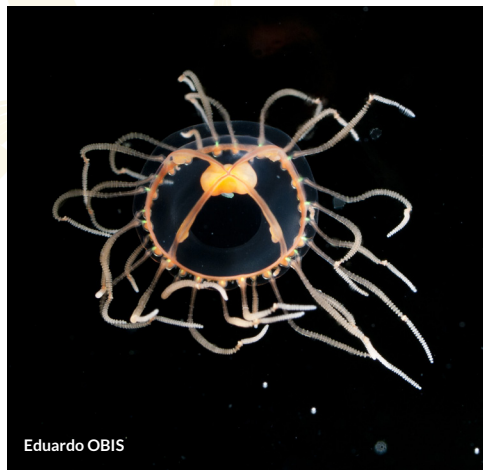

### Descripción

Hidromedusa con una umbrela que puede medir hasta 4cm de diámetro, es translúcida con las gónadas de color naranja. La rodean numerosos tentáculos, hasta 90, con ventosas en los extremos, por lo que es frecuente encontrarla adherida a algas marinas. Es una especie introducida en el Mediterráneo.

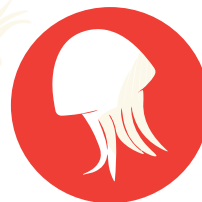

### MUY URTICANTE

Umbrela hasta 4 cm  
Muchos tentáculos cortos  
Sin brazos orales  
Gónadas naranja

**CNIDARIO**  
Hidrozoa

1

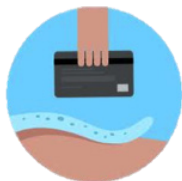

Eliminar los restos de tentáculos y/o fragmentos de medusas

2

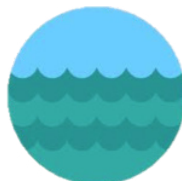

Lavar con agua de mar

3

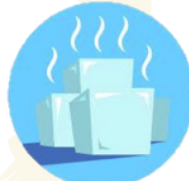

Aplicar frío por 15' (en lapsos de 3' +2' de descanso)

4

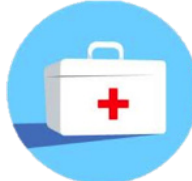

Si el dolor persiste, consultar al médico o profesional de salud

**EN CASO DE PICADURA SEGUIR LAS RECOMENDACIONES DEL PROTOCOLO GENERAL**

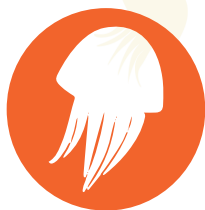

## URTICANTE

Umbrella hasta 30 cm  
Sin tentáculos  
marginales  
8 brazos orales

## CNIDARIO Escifozoo

EN CASO DE  
PICADURA  
SEGUIR LAS  
RECOMENDACIONES  
DEL PROTOCOLO  
GENERAL  
página 8

# Catostylus tagi

## Descripción

Tiene una umbrela semiesférica de coloración amarillenta, blanca azulada o a veces marrón, con 8 brazos orales cónicos en forma de coliflor. El diámetro de la umbrela puede alcanzar hasta 30 cm. Es una especie que no forma enjambres.

Se encuentra en zonas poco profundas y aguas costeras, generalmente en bahías y puertos. Es una especie introducida en el Mediterráneo. Entró por el Estrecho de Gibraltar.

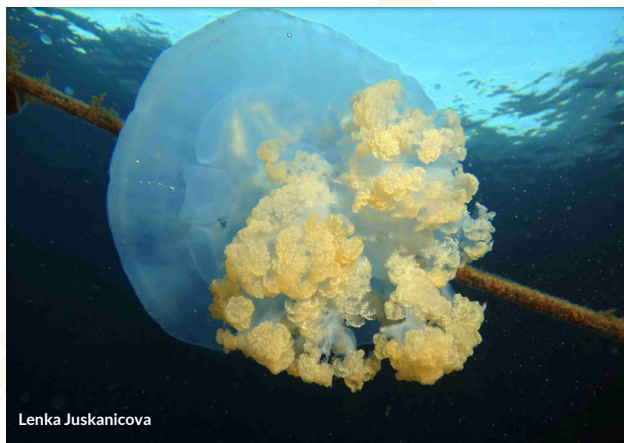

Lenka Juskanicova

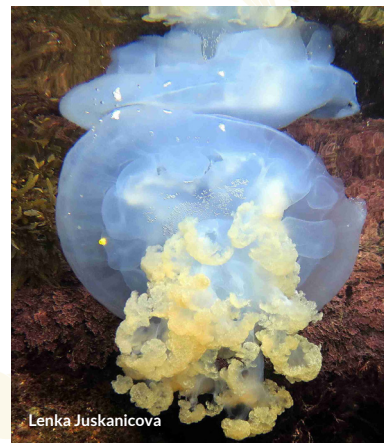

Lenka Juskanicova

# Sifonóforos

## Descripción

Los sifonóforos forman parte del holoplancton (completan todo su ciclo vital en la columna de agua, sin fase bentónica).

Son organismos coloniales. Están presentes durante todo el año pero en la primavera presentan sus máximas abundancias, aún cuando es fácil encontrarlos también en el verano.

Los más comunes en la costa Mediterránea española son *Abylopsis tetragona*, *Chelophyes appendiculata* y *Muggiaea atlantica*.

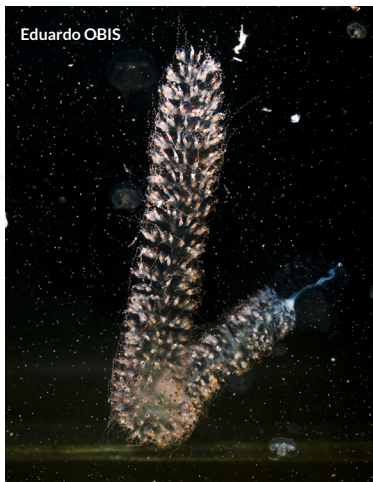

La fotografía muestra una especie del género *Forskalia*. Corresponde a una colonia de centenares de pólipos cuya estructura es cónica con un tamaño de 1 a 3 m de largo. En estas colonias hay individuos con funciones especializadas en la flotabilidad y el movimiento de la colonia, otros en la nutrición de todo el organismo y otros en la reproducción. Como todos los Cnidarios, poseen células urticantes y su capacidad urticante varía según la especie.

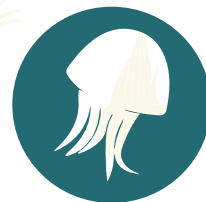

**CAPACIDAD  
URTICANTE  
SEGÚN LA  
ESPÉCIE**

**CNIDARIO**  
**Hidrozoo**  
**Sifonóforo**

**EN CASO DE  
PICADURA  
SEGUIR LAS  
RECOMENDACIONES  
DEL PROTOCOLO  
GENERAL**  
**página 8**



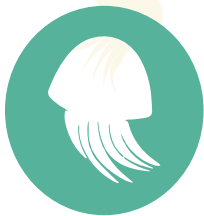

NO URTICANTE

**CHORDATA**  
**Tunicado**

# Salpas

## Descripción

Tunicados pelágicos gelatinosos. Son organismos translúcidos con un cuerpo en forma de barril. Se distingue claramente en un extremo del cuerpo, el estómago como un botón azul (en el caso de *Thalia democratica*) o de color marrón rojizo (en el caso de diversas especies como por ejemplo, en *Salpa fusiformis*). En la costa catalana suelen aparecer durante la primavera y el otoño.

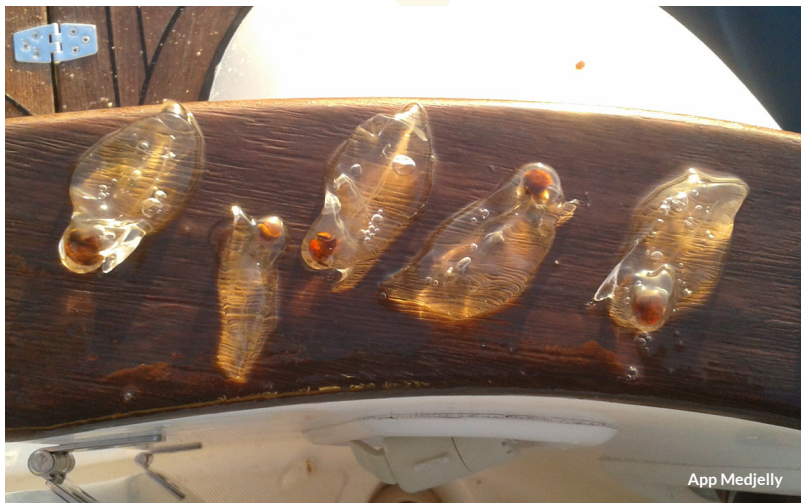

App Medjelly

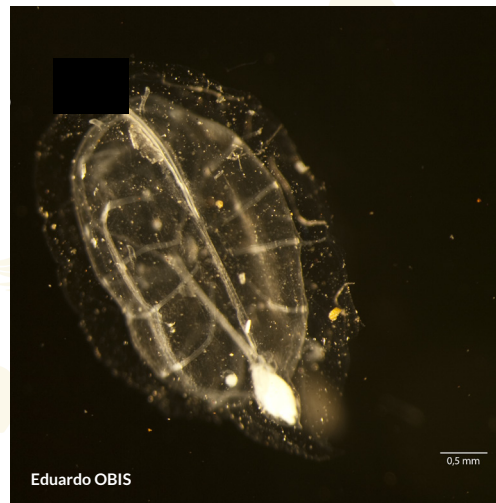

Eduardo OBIS



# Leucothea multicornis

## Descripción

Es un ctenóforo y no posee células urticantes. Tiene un cuerpo translúcido, lateralmente comprimido, que puede alcanzar hasta 20 cm de longitud.

La superficie del cuerpo está cubierta por numerosas papilas retráctiles e hileras de cilios brillantes. Presente dos lóbulos subdivididos en dos que salen de la mitad de la boca y dos tentáculos largos y finos, uno a cada costado del cuerpo.

Suelen ser abundantes en la época de primavera, coincidiendo con la proliferación de muchos organismos del plancton gelatinoso.

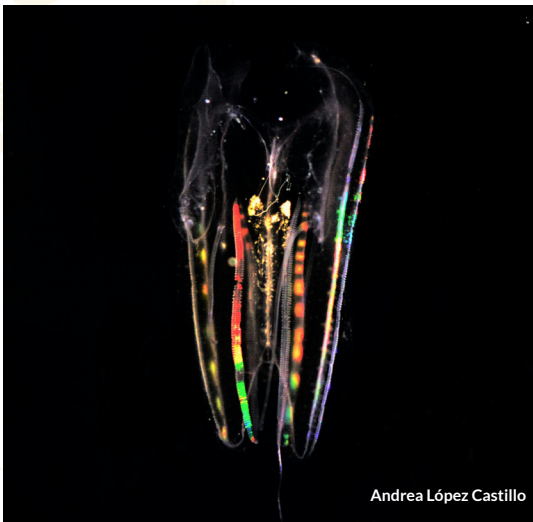

Andrea López Castillo

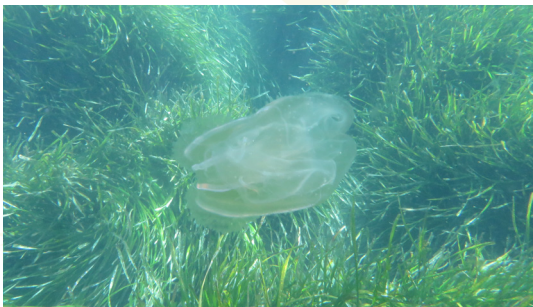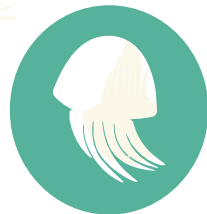

**NO URTICANTE**

Cuerpo hasta 20 cm

Fusiforme

Lóbulos laterales

**CTENÓFORO**

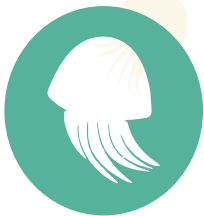**NO URTICANTE****Longitud hasta 30 cm****Forma ovalada  
8 hileras de cilios****CTENÓFORO****Descripción**

*Es un ctenóforo, organismo gelatinoso que no posee células urticantes. Tiene una longitud que puede alcanzar hasta 30 cm. Cuerpo de forma ovalada o cilíndrica con una compresión lateral muy marcada.*

*Es translúcido, con una coloración azulada pálida o a veces rosa pálido. En la superficie presenta 8 hileras longitudinales de cilios y no posee tentáculos.*

*Es nativo del Atlántico occidental.*

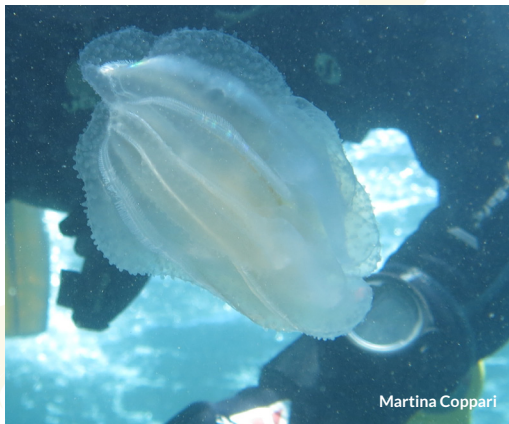

Martina Coppari

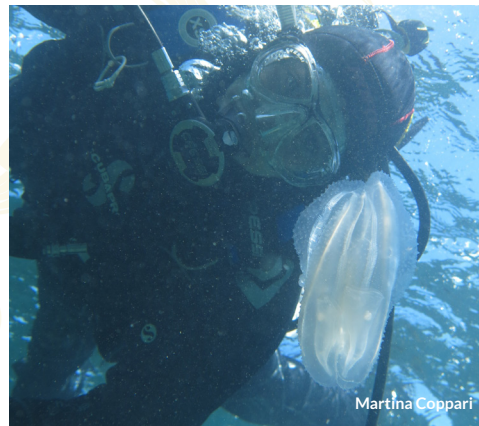

Martina Coppari

# Beroe ovata

**Globo de mar**

# Mnemiopsis leidyi

Medusa bombilla o peine

**Descripción**  
Ctenóforo nativo del Atlántico occidental. La longitud de su cuerpo puede alcanzar hasta 12 cm. Tiene forma ovalada y es translúcido. Los adultos poseen 8 hileras lineales de cilios en forma de peines y no tienen tentáculos. Es una especie invasora en el Mar MEditerráneo y en la costa catalan se encuentra restringido a zonas específicas. Esta especie es un ctenóforo y no tiene células urticantes, por lo que inofensivo para la salud humana, pero es muy nocivo para los ecosistemas invadidos.

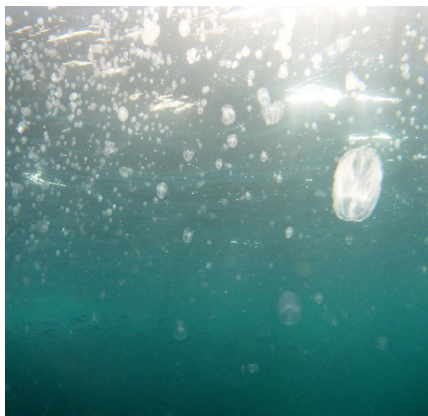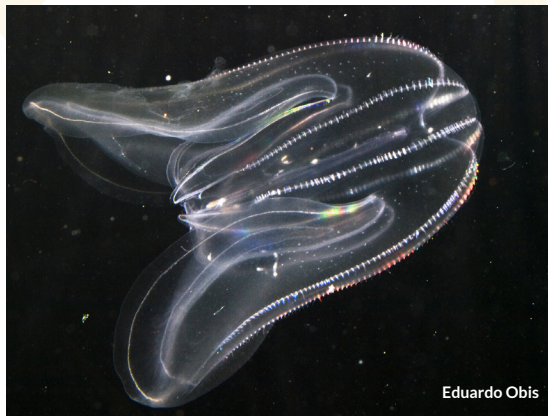

Eduardo Obis

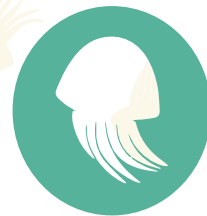

**NO URTICANTE**

Longitud hasta 12 cm  
Forma ovalada  
8 hileras de cilios

**CTENÓFORO**

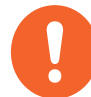

**ESPECIE  
INVASORA EN EL  
MEDITERRÁNEO**

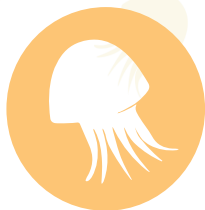

## POCO URTICANTE

Umbrella hasta 70 cm  
Sin tentáculos marginales  
8 brazos orales

## CNIDARIO Escifozoo

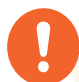

ESPÉCIE  
INVASORA EN EL  
MEDITERRÁNEO

EN CASO DE  
PICADURA  
SEGUIR LAS  
RECOMENDACIONES  
DEL PROTOCOLO  
GENERAL  
página 8

# Phyllorhiza punctata

Medusa de lunares blancos

## Descripción

El diámetro de la umbrela puede alcanzar hasta 70 cm. Es semiesférica y tiene lunares blancos distribuidos uniformemente. No tiene tentáculos marginales pero posee 8 brazos orales gruesos, con 14 apéndices transparentes en el extremo. Puede presentar dos coloraciones, marrón verdosa oscura o blanco azulado. Es nativa del Indo-Pacífico. Su primer registro en la costa catalana fue el año 2010 y se encuentra restringida a zonas específicas.

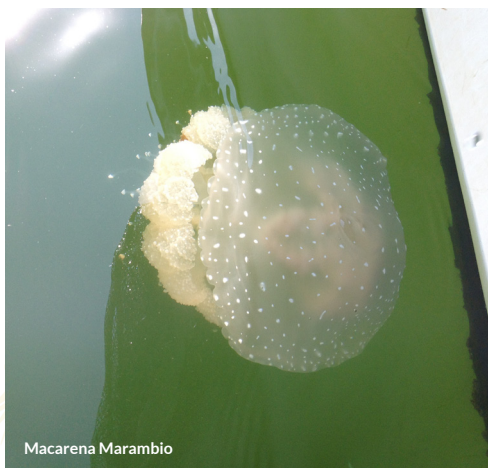

Macarena Marambio

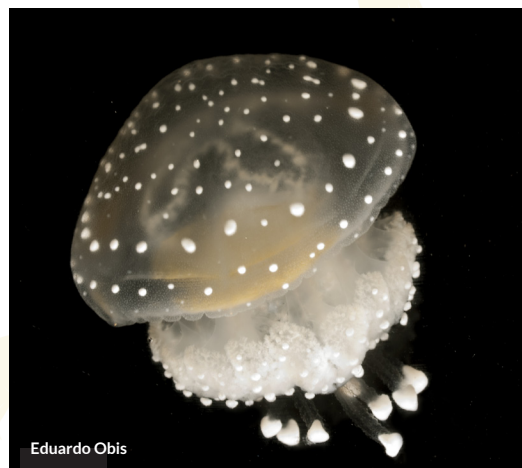

Eduardo Obis

# Otras medusas del Mediterráneo

## *Mawia benovici*

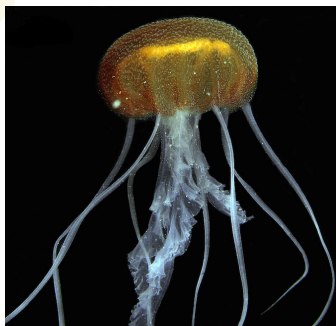

Umbrella semiesférica de color amarillo ocre con verrugas blanquecinas. 4 brazos orales y 8 tentáculos marginales.

## *Drymonema dalmatinum*

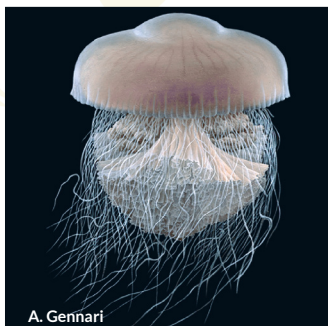

Umbrella aplanada y blanquecina, de hasta 1 m de diámetro. 4 brazos orales y numerosos tentáculos marginales.

## *Rhopilema nomadica*

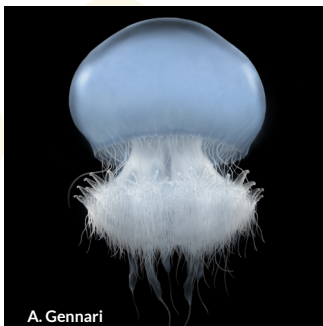

Especie introducida. Umbrella semiesférica, azul y translúcida de hasta 80 cm de diámetro. 8 brazos orales y numeroso tentáculos marginales.

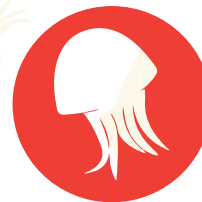

**MUY URTICANTE**

**CNIDARIO**  
Escifozoo

**EN CASO DE  
PICADURA  
SEGUIR LAS  
RECOMENDACIONES  
DEL PROTOCOLO  
GENERAL  
página 8**



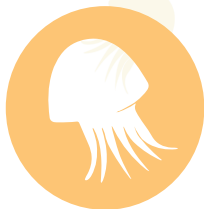

POCO URTICANTE

**CNIDARIO**  
Escifozoo

**EN CASO DE  
PICADURA  
SEGUIR LAS  
RECOMENDACIONES  
DEL PROTOCOLO  
GENERAL  
página 6**

# Otras medusas del Mediterráneo

*Cassiopea spp.*

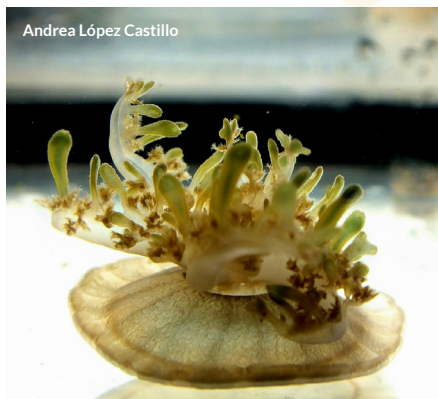

Conocida como medusa invertida. Umbrella aplanada de hasta 30 cm de diámetro, marrón amarillento y con lunares blancos. 8 brazos orales y sin tentáculos marginales.

*Marivagia stellata*

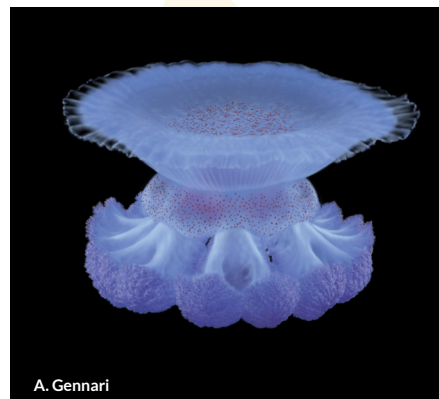

Especie introducida. Umbrella aplanada y translúcida blanca azulada de hasta 15 cm de diámetro. 8 brazos orales sin tentáculos marginales.

# Otras medusas del Mediterráneo

## *Liriope tetrphylla*

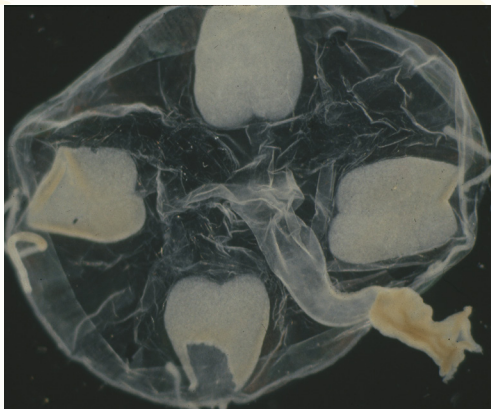

Hidromedusa muy común en el Mediterráneo. Umbrella semiesférica de hasta 30 mm de diámetro. Translúcida con 4 gónadas. 4 tentáculos largos.

## *Geryonia proboscidalis*

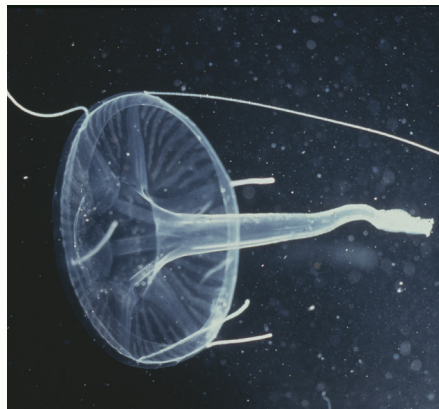

Hidromedusa con umbrella casi hemisférica con un diámetro de hasta 80 mm. Translúcida y con 6 gónadas. 12 tentáculos (6 largos y 6 cortos alternados).

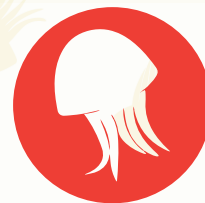

**MUY URTICANTE**

**CNIDARIO**  
Hidrozoa

**EN CASO DE  
PICADURA  
SEGUIR LAS  
RECOMENDACIONES  
DEL PROTOCOLO  
GENERAL  
página 6**

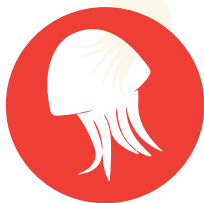

**MUY URTICANTE**

**CNIDARIO**  
**Hidrozoo**

**EN CASO DE  
PICADURA  
SEGUIR LAS  
RECOMENDACIONES  
DEL PROTOCOLO  
GENERAL  
página 8**

# Otras medusas del Mediterráneo

*Neotima  
lucullana*

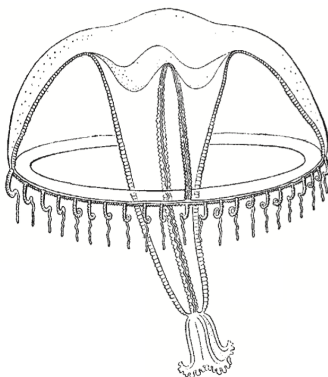

*Hidromedusa con una  
umbrella más plana que  
hemisférica, de hasta 75 mm  
de diámetro. Translúcida con  
70 tentáculos.*

*Solmissus  
albescens*

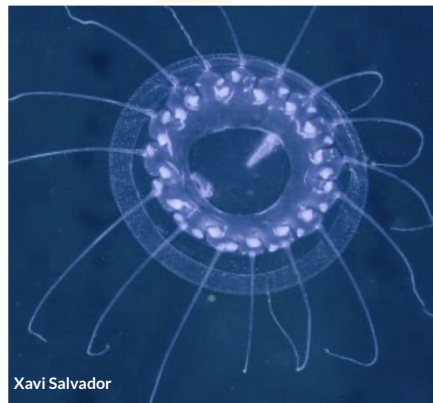

*Hidromedusa con una  
umbrella de hasta 50 mm de  
diámetro. Presenta 14-16  
tentáculos casi tan largos  
como el diámetro de la  
umbrella.*

Xavi Salvador



# Otros Cnidarios del Mediterráneo:

## Anémonas

Las anémonas no son organismos del zooplancton gelatinosos pero pertenecen al mismo filo que las medusas, Cnidaria. Son organismos marinos (aproximadamente unas 1000 especies) que carecen de esqueleto y presentan tentáculos largos con cnidocitos. Se incluyen en esta guía ya que se trata de organismos con capacidad urticante, aunque sólo pocas especies pueden provocar efecto perceptible en las personas, variando desde un picor muy débil hasta casos de gran intensidad que pueden incluir mucho dolor y cicatrices.

**Anemonia  
viridis**

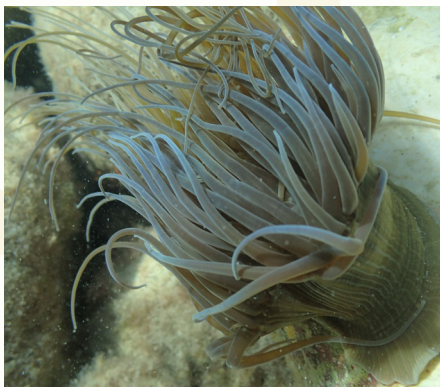

Conocida también como anémona común. Tiene tentáculos de coloración verde claro a gris verdoso violeta, con puntas a menudo violeta. Habita en costas rocosas someras y hasta 30 m de profundidad.

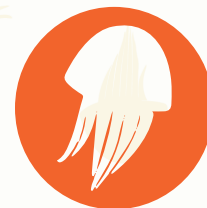

**URTICANTE**

**CNIDARIO**  
Anthozoa

**EN CASO DE  
PICADURA  
SEGUIR LAS  
RECOMENDACIONES  
DEL PROTOCOLO  
GENERAL  
página 8**

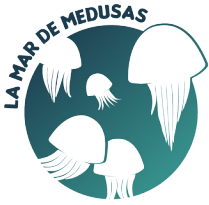

# Precauciones ante la presencia de medusas en las playas

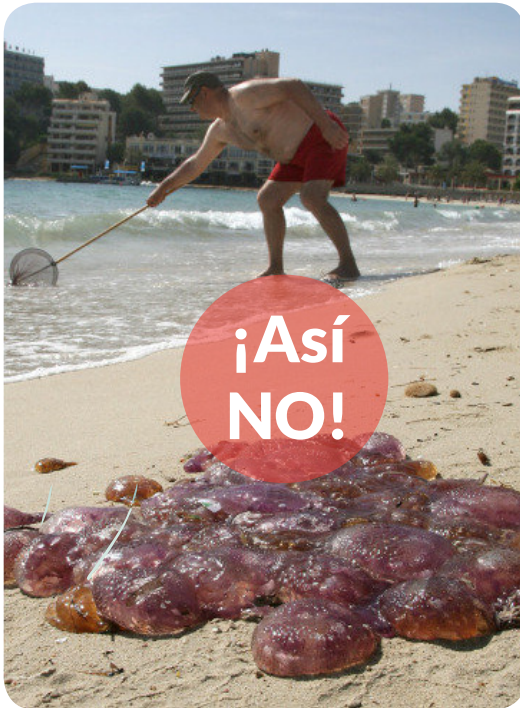

**No retirar del agua las medusas** porque con la manipulación pueden activarse las células urticantes. Los objetos que hayan tocado la medusa pueden quedar con restos de cnidocitos y provocar una picadura posterior.

**No dejar las medusas en la arena** porque sus restos siguen siendo urticantes por un tiempo.

**Informar al personal de playa** para que valore la situación.

Ante un encuentro con medusas en el agua, **nadar pausadamente y salir del agua sin movimientos bruscos.**

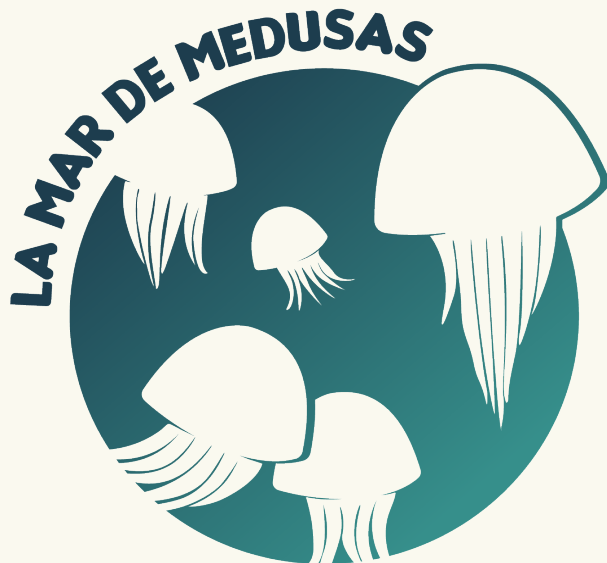

## **Equipo del proyecto La Mar de Medusas**

*Coordinadora del área científica*

**Macarena Marambio**

*Coordinadora del área educativa*

**Janire Salazar**

*Coordinadora del área de difusión*

**Ainara Ballesteros**

*Responsable del proyecto*

**Josep-Maria Gili**

**Contáctanos a [lamardemedusas@gmail.com](mailto:lamardemedusas@gmail.com)**

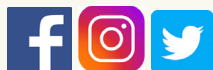

**@lamardemedusas**

**Autores: Macarena Marambio, Ainara Ballesteros, Laura López, Verónica Fuentes, Josep Maria Gili**

**Diseño: Lau López @laulopezarts**
